# Supplementary material
Source: HighWire-hosted journal article supplement (https://www.rcpjournals.org/highwire/filestream/11630/field_highwire_adjunct_files/0/Sood_Supplementary_material_S1.pdf)

## S1 – Demographic analysis

**Table 1: Successful applications by gender and location**

| Cohort 1         |      |        |       | Cohort 2 |        |       |
|------------------|------|--------|-------|----------|--------|-------|
| Region           | Male | Female | Total | Male     | Female | Total |
| South of England | 25   | 7      | 32    | 12       | 10     | 22    |
| London           | 17   | 5      | 22    | 15       | 10     | 25    |
| North of England | 16   | 6      | 22    | 23       | 9      | 32    |
| Midlands & East  | 14   | 4      | 18    | 6        | 9      | 15    |
| National/Other   | 11   | 0      | 11    | 3        | 7      | 10    |

**Table 2: Male applicants - variation in job role descriptions – cohort one**

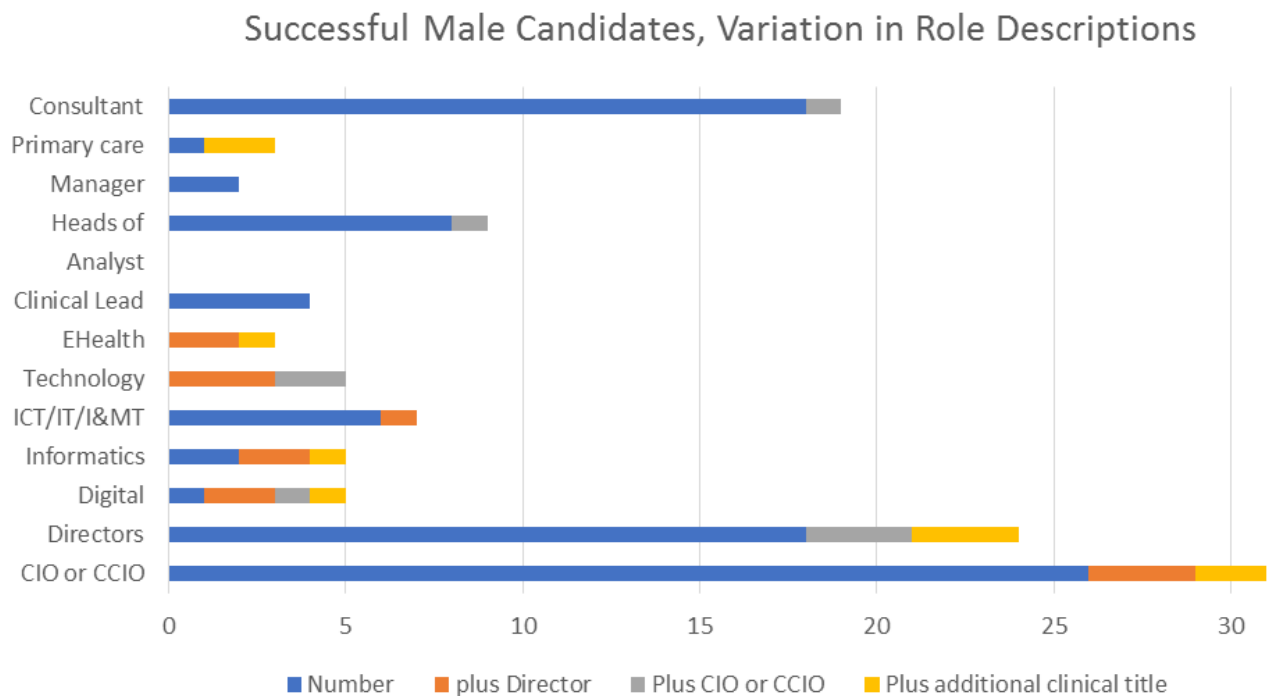

**Table 3: Female applicants - variation in job role descriptions – cohort one**

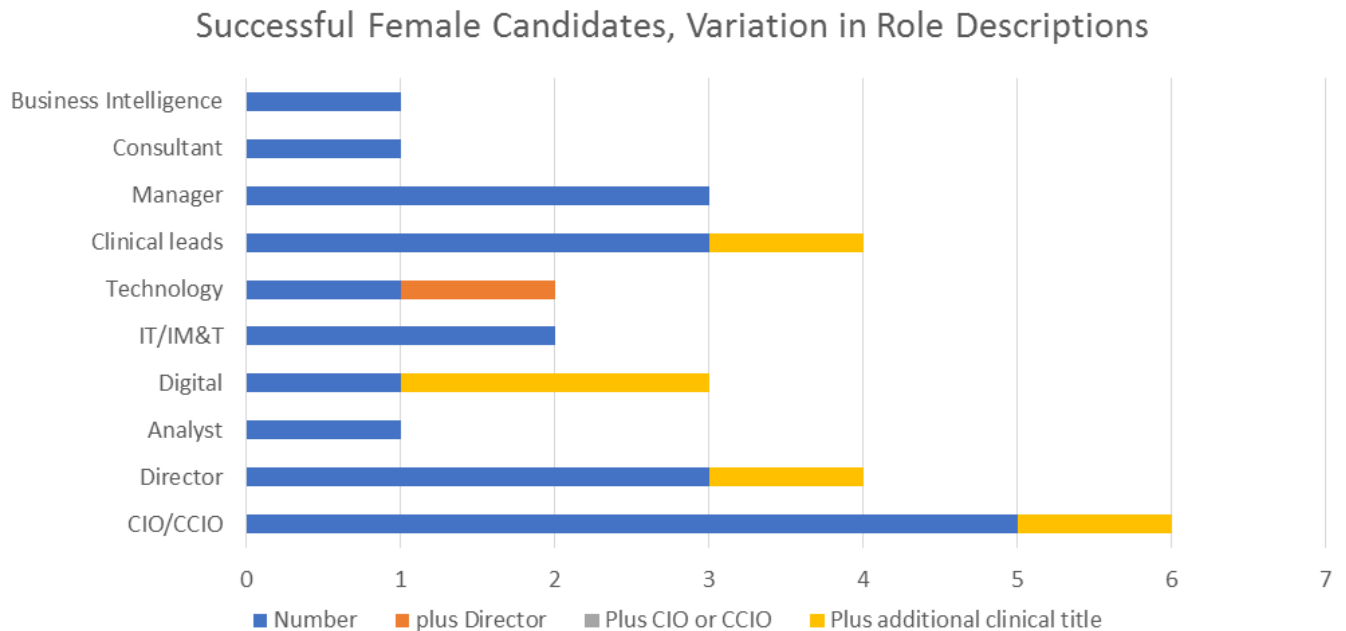

**Table 4: Male applicants - variation in job role descriptions – cohort two**

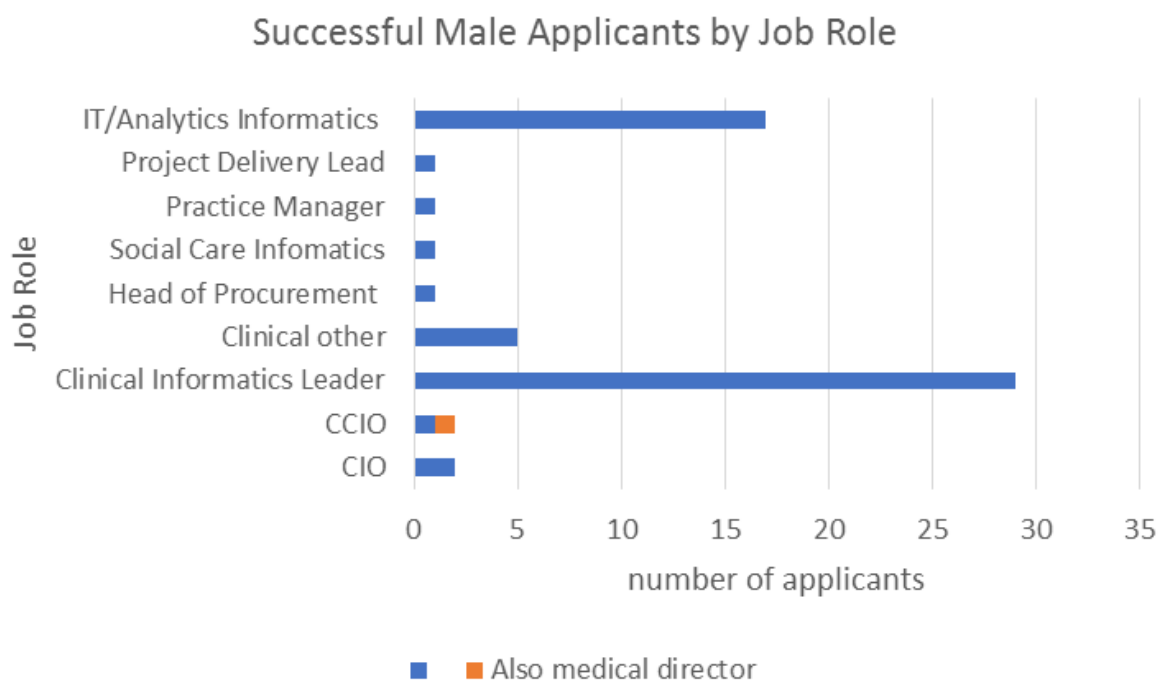

**Table 5: Female applicants - variation in job role descriptions – cohort two**

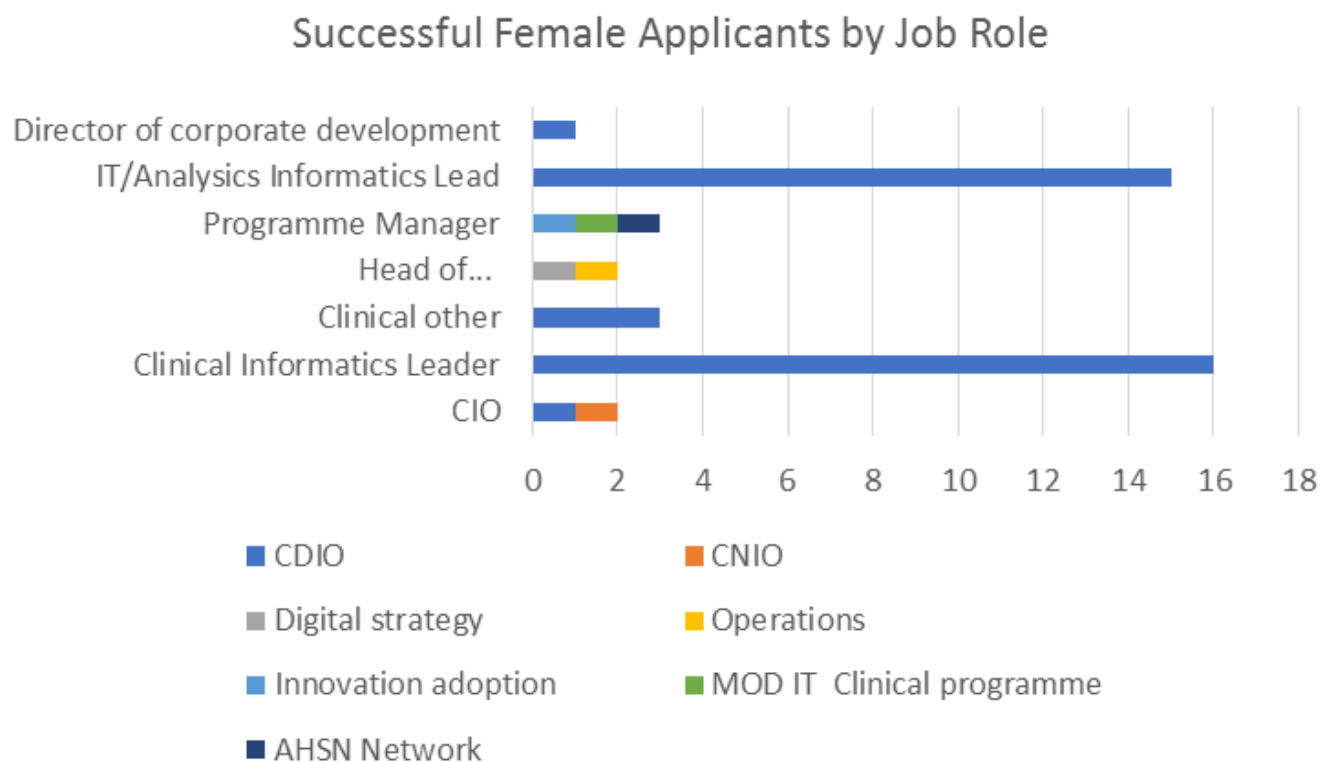

Supplement: Sood_Supplementary_material_S1.pdf [file Sood_Supplementary_material_S1.pdf]
